# Supplementary material
Source: PubMed Central journal article supplement (PMC7832683)
Supplement: mmc1.pdf [file mmc1.pdf]

**Appendix**  
**Health and Institutional Risk Factors of COVID-19 Mortality in Mexico, 2020**  
**Najera and Ortega-Avila**

**Appendix Table 1.** Percentage of COVID-19 Officially Registered Deaths by Population's Characteristics

| Variable              | Without characteristic<br>% (SE) | With characteristic<br>% (SE) |
|-----------------------|----------------------------------|-------------------------------|
| <b>Demographic</b>    |                                  |                               |
| Male                  | 8 (0.08)                         | 13 (0.07)                     |
| Indigenous people     | 11 (0.08)                        | 17 (0.06)                     |
| Aged ≤49 years        | 24 (0.05)                        | 3 (0.09)                      |
| <b>Illness</b>        |                                  |                               |
| Obesity               | 10 (0.08)                        | 14 (0.07)                     |
| Diabetes              | 9 (0.08)                         | 26 (0.07)                     |
| Asthma                | 12 (0.08)                        | 8 (0.08)                      |
| Smoker                | 12 (0.08)                        | 12 (0.07)                     |
| Immunosuppressants    | 12 (0.08)                        | 24 (0.05)                     |
| High blood pressure   | 9 (0.08)                         | 24 (0.05)                     |
| Chronic renal disease | 12 (0.08)                        | 38 (0.02)                     |
| Heart disease         | 12 (0.08)                        | 28 (0.04)                     |
| <b>Institution</b>    |                                  |                               |
| State (local)         |                                  | 12 (0.08)                     |
| IMSS                  |                                  | 19 (0.06)                     |
| ISSSTE                |                                  | 17 (0.07)                     |
| PEMEX                 |                                  | 15 (0.09)                     |
| PRIVATE               |                                  | 4 (0.09)                      |
| SEMAR                 |                                  | 6 (0.10)                      |
| SEDENA                |                                  | 11 (0.09)                     |
| SSA                   |                                  | 6 (0.06)                      |

*Note:* Age was included in the model as a continuous variable. Army health system: SEDENA and SEMAR; Mexican Petroleum Institution: PEMEX; Open public health system: SSE; Social security systems: IMSS and ISSSTE.

**Appendix**  
**Health and Institutional Risk Factors of COVID-19 Mortality in Mexico, 2020**  
**Najera and Ortega-Avila**

**Hierarchical Bayesian Model**

$$Pr(y_i = 1) = \text{logit}^{-1}(\alpha_{ijk} + X_i\beta),$$

for  $i = 1, \dots, n$

Random effects

$$a_j \sim N(\mu_\alpha, \sigma_{state}^2), j = 1, \dots, 32$$

$$a_k \sim N(\mu_\alpha, \sigma_{municipalities}^2), j = 1, \dots, 2137$$

Priors

$$\beta \sim N(0,1)$$

$$\sigma_{state}^2 \sim N(0,1)$$

$$\sigma_{municipalities}^2 \sim N(0,1)$$

Where,  $Pr(y_i = 1)$  is the probability of death given both state-level and municipal-level  $\alpha_{jk}$  random effect (specific intercepts for each unit, 32 for states and 2137 intercepts for municipalities), and the estimated effect  $\beta$  of all  $X$  variables included in the model. The model uses weak priors  $\beta \sim N(0,1)$  for the individual-level variables and weak priors for the random effects  $\mu_{\alpha_{jk}} \sim N(0,1)$

The matrix  $X$  is given by all the variables in Table 1.

**Appendix**  
**Health and Institutional Risk Factors of COVID-19 Mortality in Mexico, 2020**  
**Najera and Ortega-Avila**

**Appendix Figure 1.** State-level random effects (i.e., average mean death risk for each state after adjusting by for all the other observed variables in the model), Hierarchical Bayesian model.

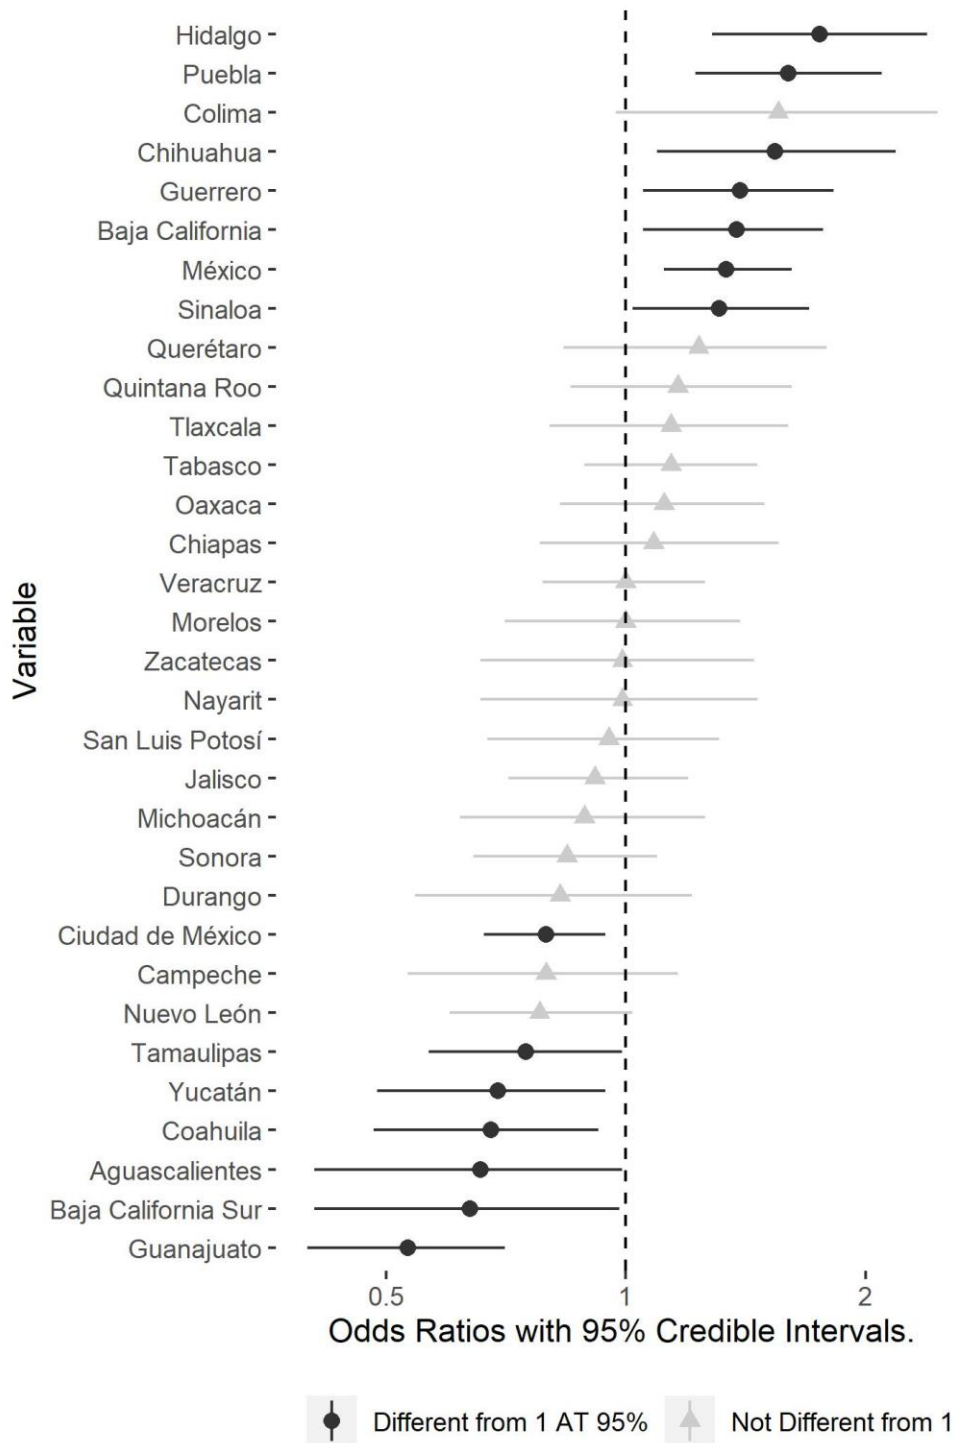

**Appendix**  
**Health and Institutional Risk Factors of COVID-19 Mortality in Mexico, 2020**  
**Najera and Ortega-Avila**

**Appendix Figure 2.** Estimated effect of obesity upon COVID-19 mortality by risk group.

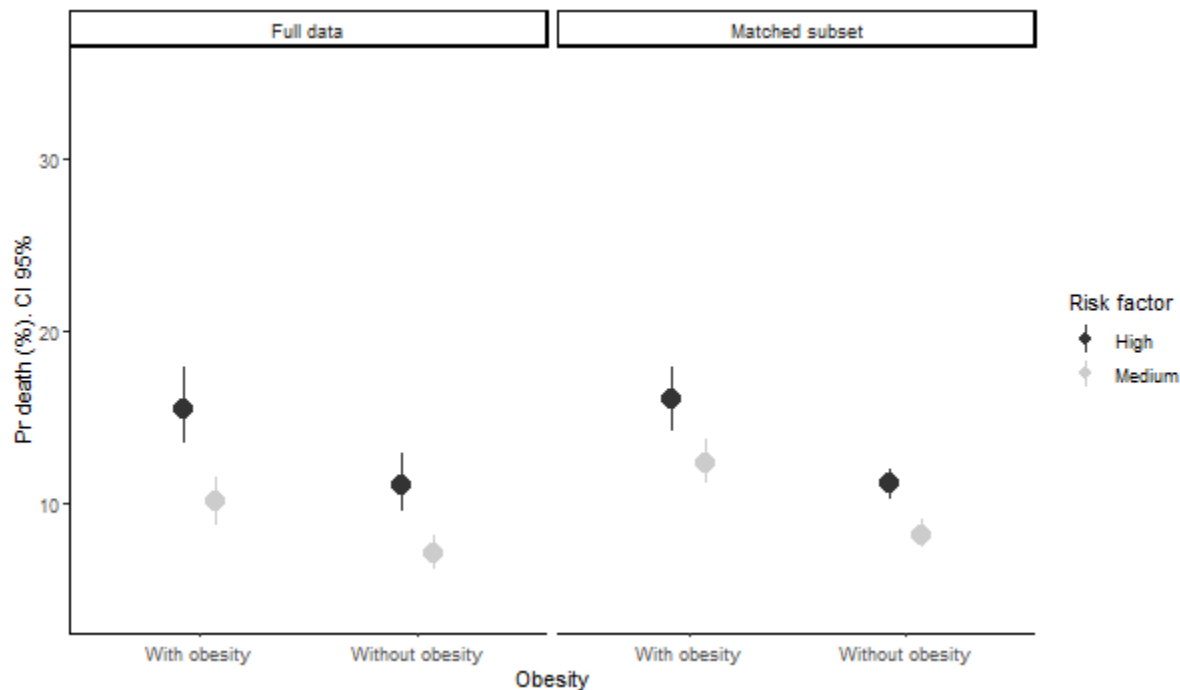

*Notes:* Full data vs matched subset from the quasi-experimental analysis, 95% CI. The plot compares the estimates of the Bayesian model (full data) with the estimates from the equivalent subset (similar patient's). The analysis considers the high-risk group and the medium/typical risk group.

**Appendix**  
**Health and Institutional Risk Factors of COVID-19 Mortality in Mexico, 2020**  
**Najera and Ortega-Avila**

**Appendix Figure 3.** Estimated effect of diabetes upon COVID-19 mortality by risk group.

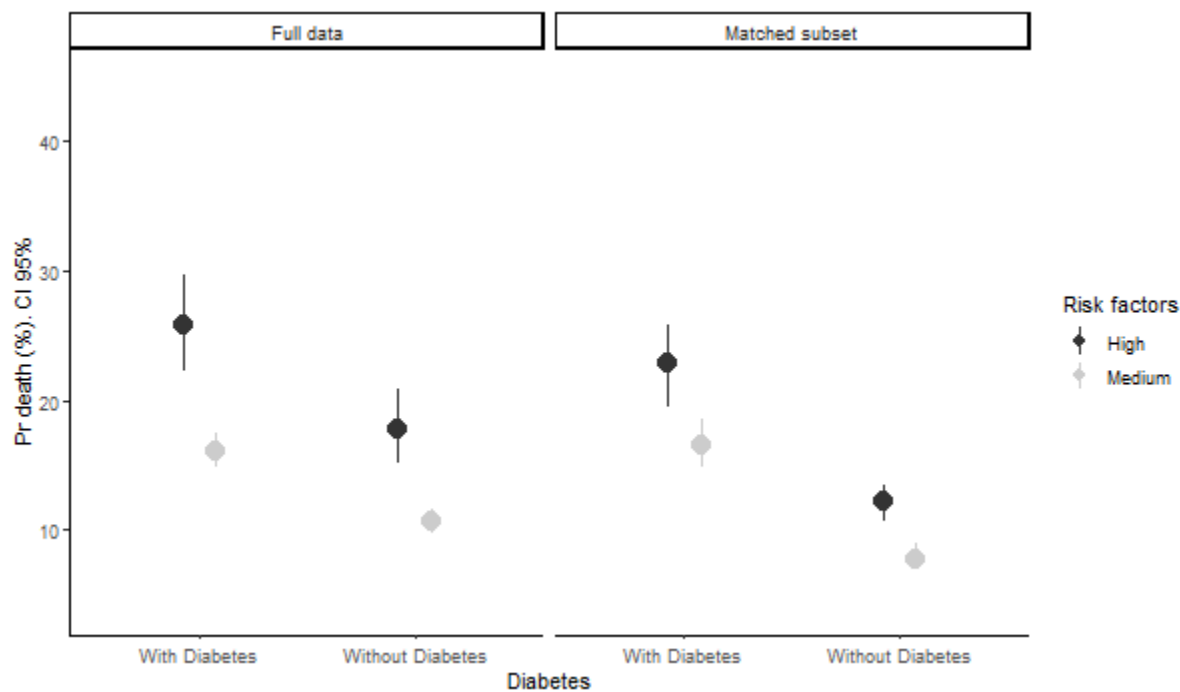

*Notes:* Full data vs matched subset from the quasi-experimental analysis, 95% CIs. The plot compares the estimates of the Bayesian model (full data) with the estimates from the equivalent subset (similar patient's). The analysis considers the high-risk group and the medium/typical risk group.

**Appendix**  
**Health and Institutional Risk Factors of COVID-19 Mortality in Mexico, 2020**  
**Najera and Ortega-Avila**

**Appendix Figure 4.** Estimated effect of hypertension upon COVID-19 mortality by risk group.

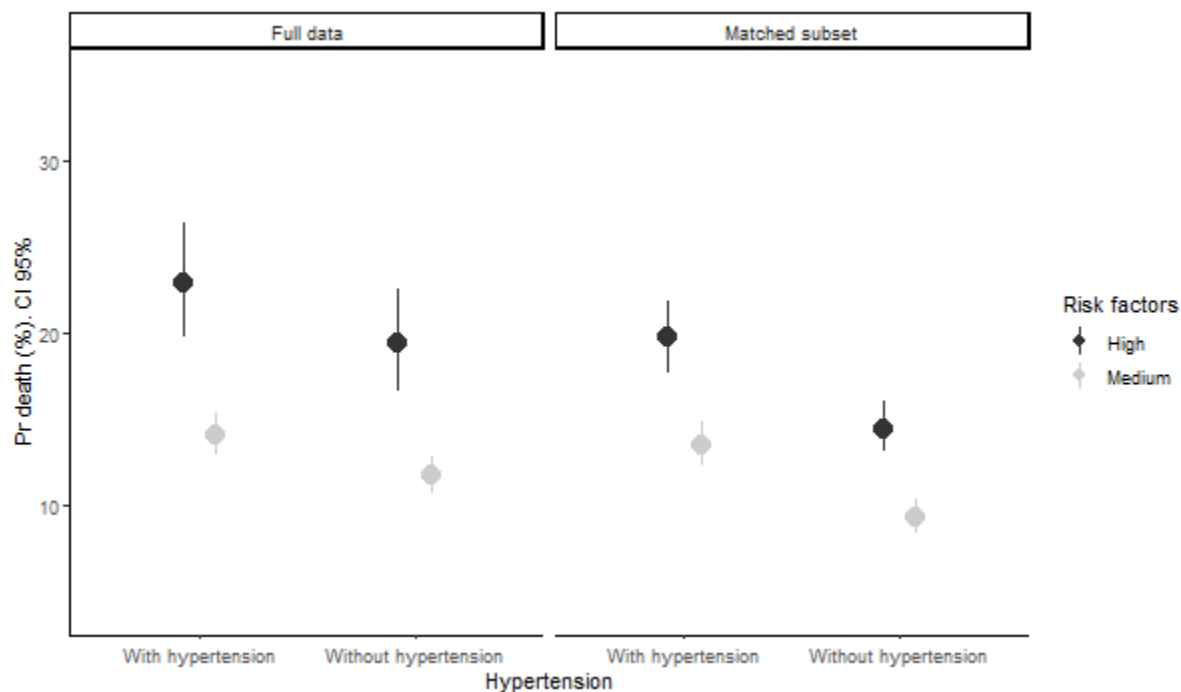

*Notes:* Full data vs matched subset from the quasi-experimental analysis, 95% CIs. The plot compares the estimates of the Bayesian model (full data) with the estimates from the equivalent subset (similar patient's). The analysis considers the high-risk group and the medium/typical risk group.

**Appendix Figure 5.** Assessment of the effect of population differences upon the state-level coefficients.

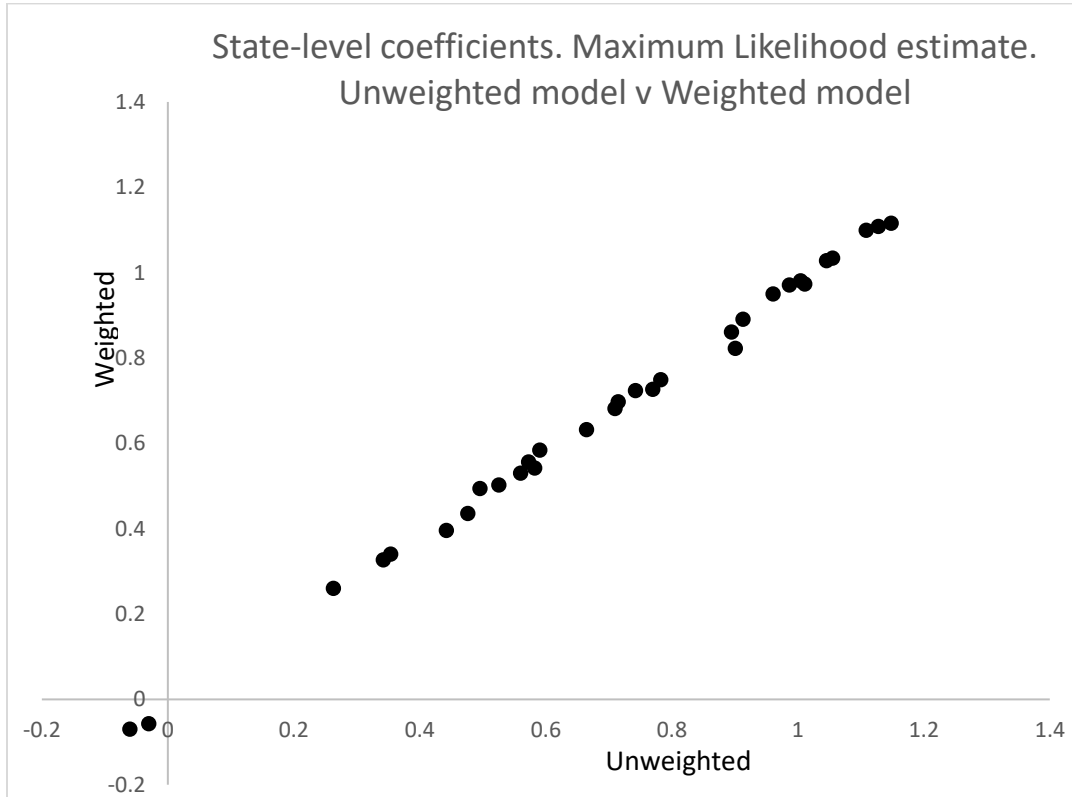

*Notes:* Maximum Likelihood estimates. Correlation=0.98. The estimates on the y-axis correspond to ML population weighted estimates and the estimates on the x-axis correspond to ML unweighted estimates. As can be appreciated, after adjusting for individual-level variables, the observed differences in risk are virtually equivalent.
